# Supplementary material
Source: PubMed Central journal article supplement (PMC4253522)

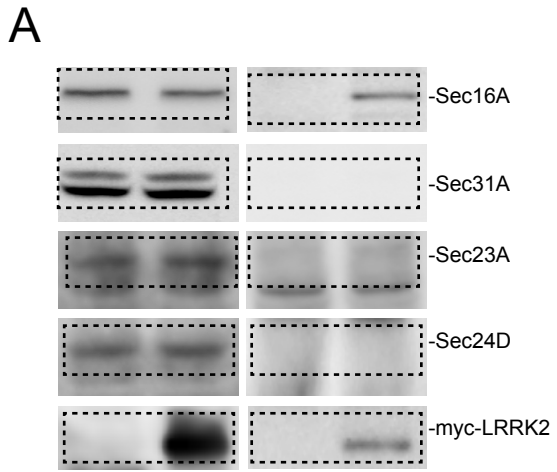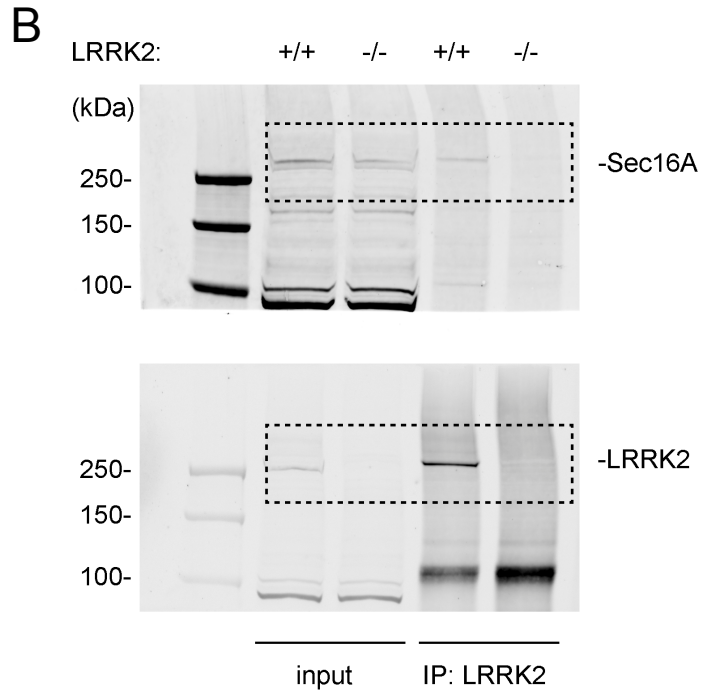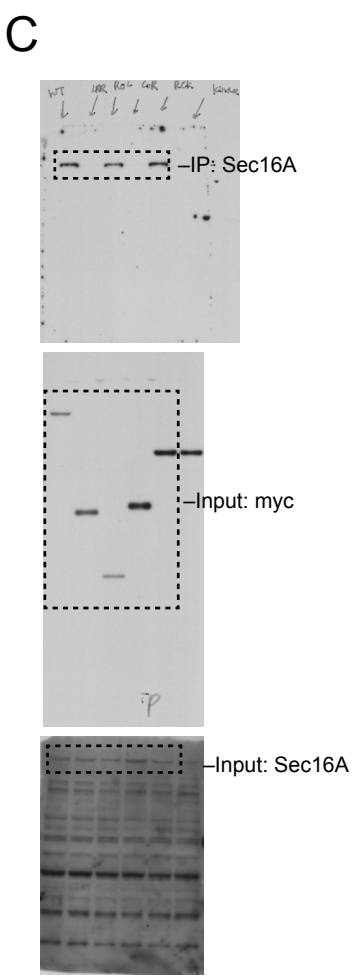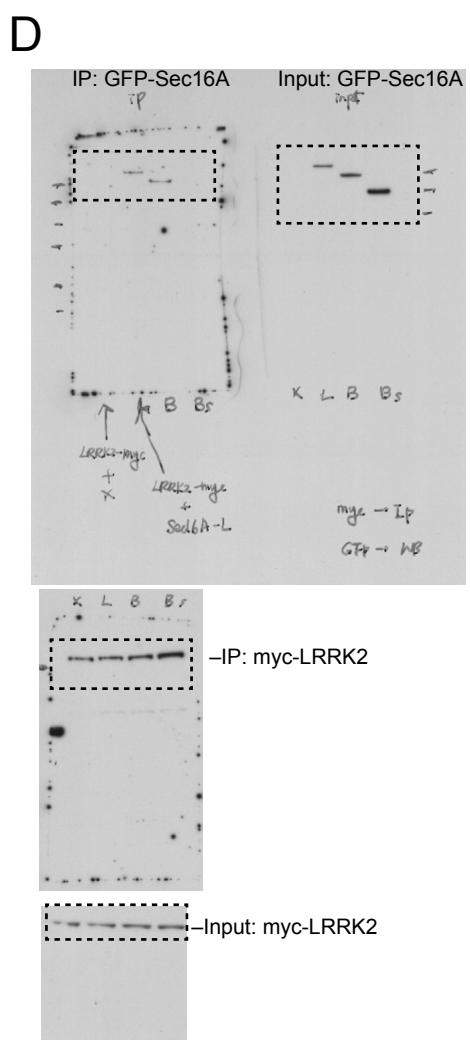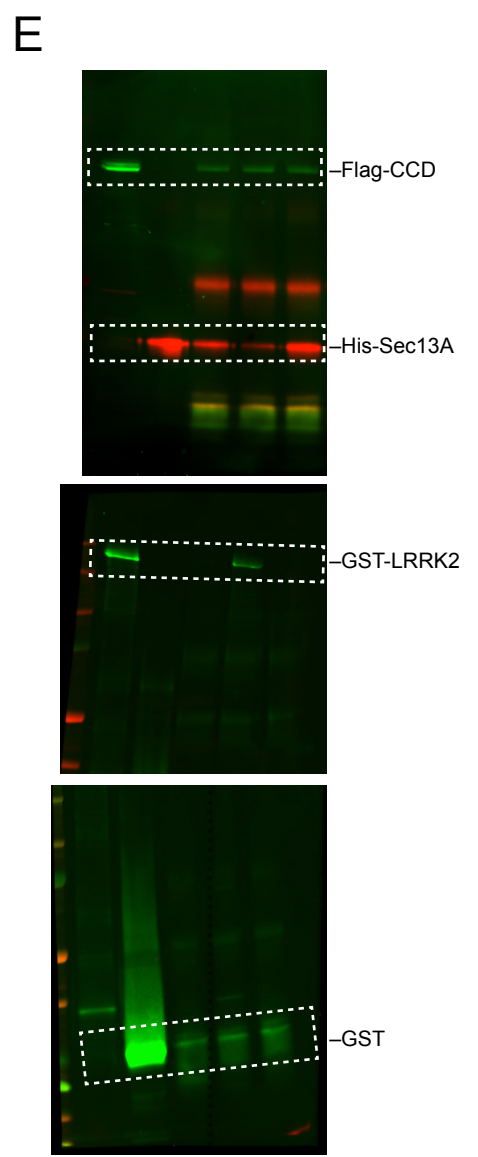

Supplement: embj0033-2314-sd3.pdf [file embj0033-2314-sd3.pdf]

D

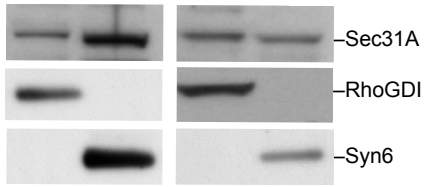

E

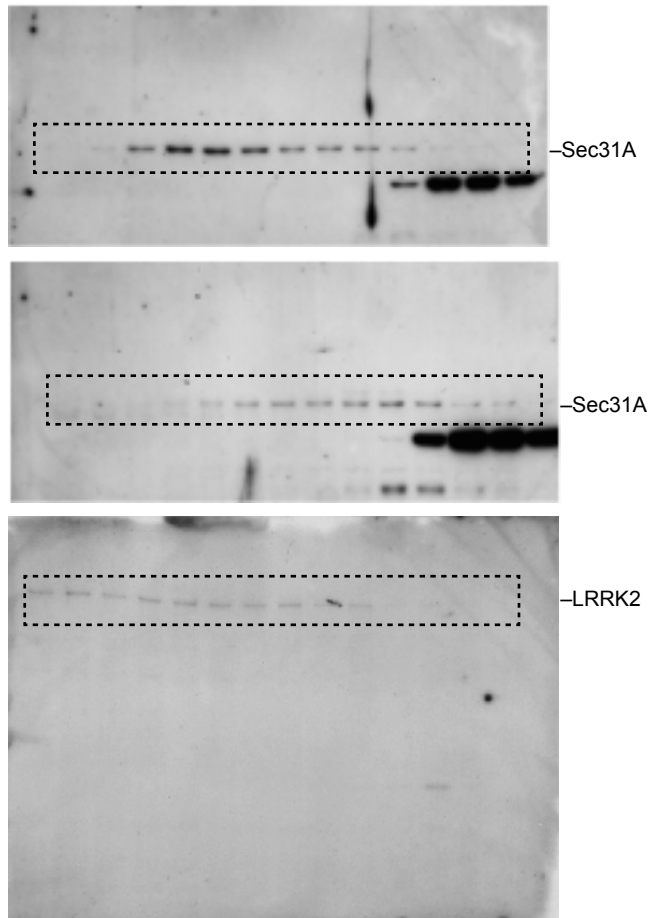

G

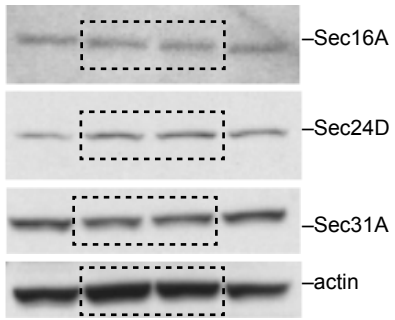

Supplement: embj0033-2314-sd4.pdf [file embj0033-2314-sd4.pdf]

F

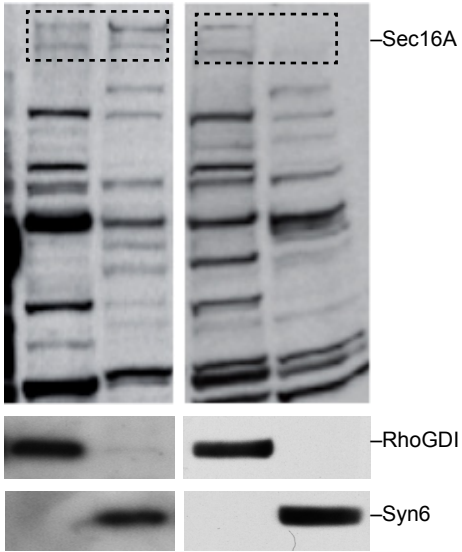

G

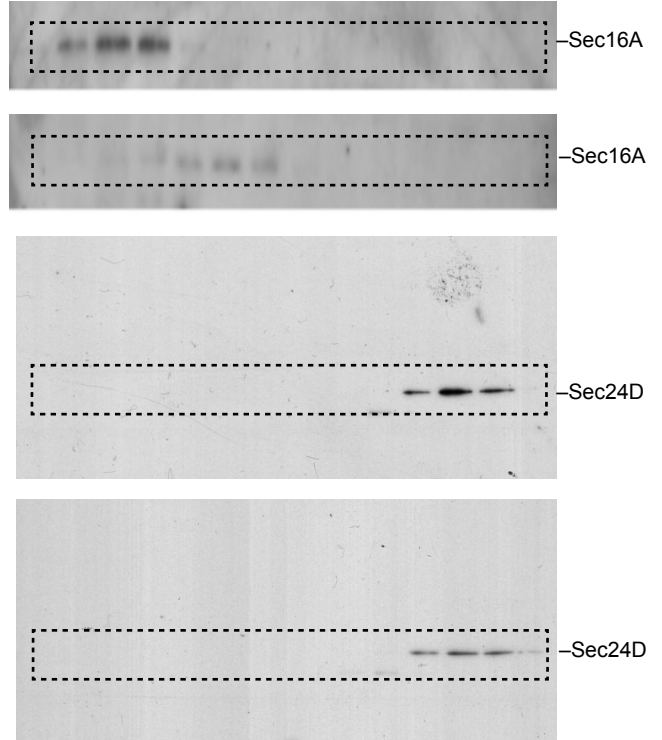

Supplement: embj0033-2314-sd5.pdf [file embj0033-2314-sd5.pdf]

C

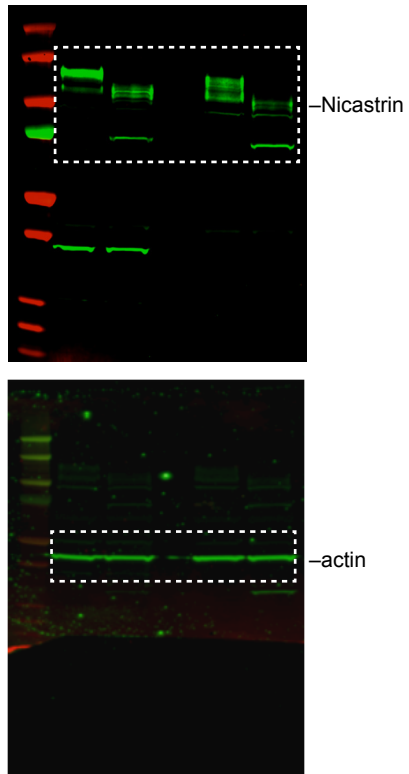

E

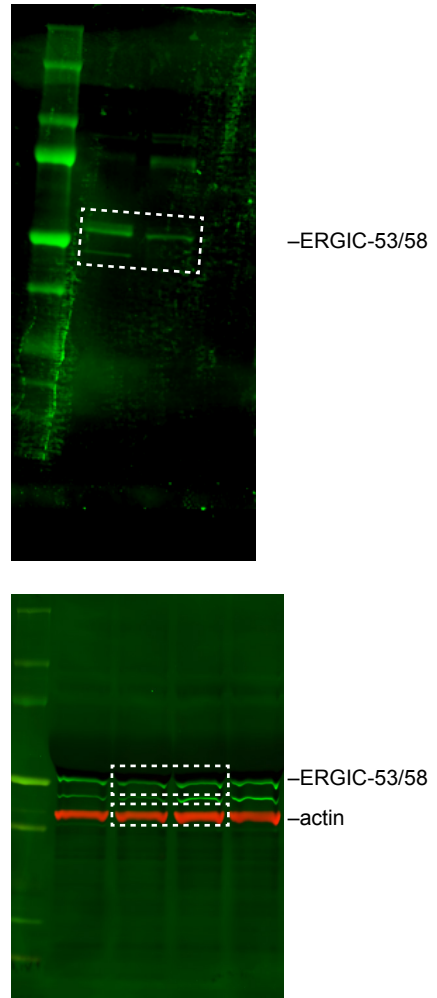

Supplement: embj0033-2314-sd6.pdf [file embj0033-2314-sd6.pdf]

A

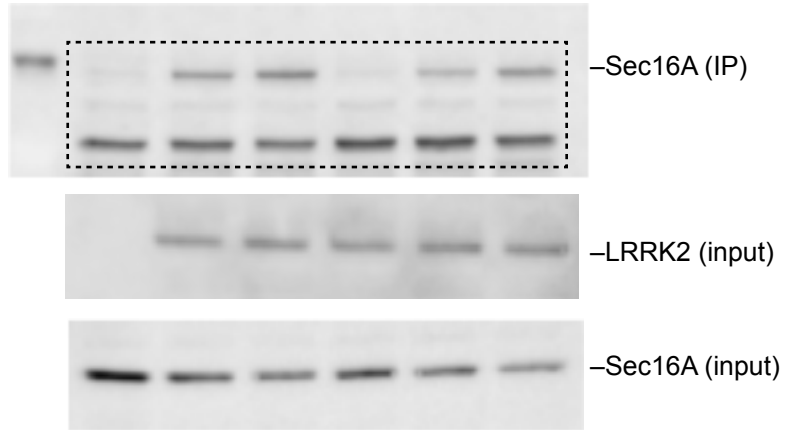

Supplement: embj0033-2314-sd7.pdf [file embj0033-2314-sd7.pdf]

A

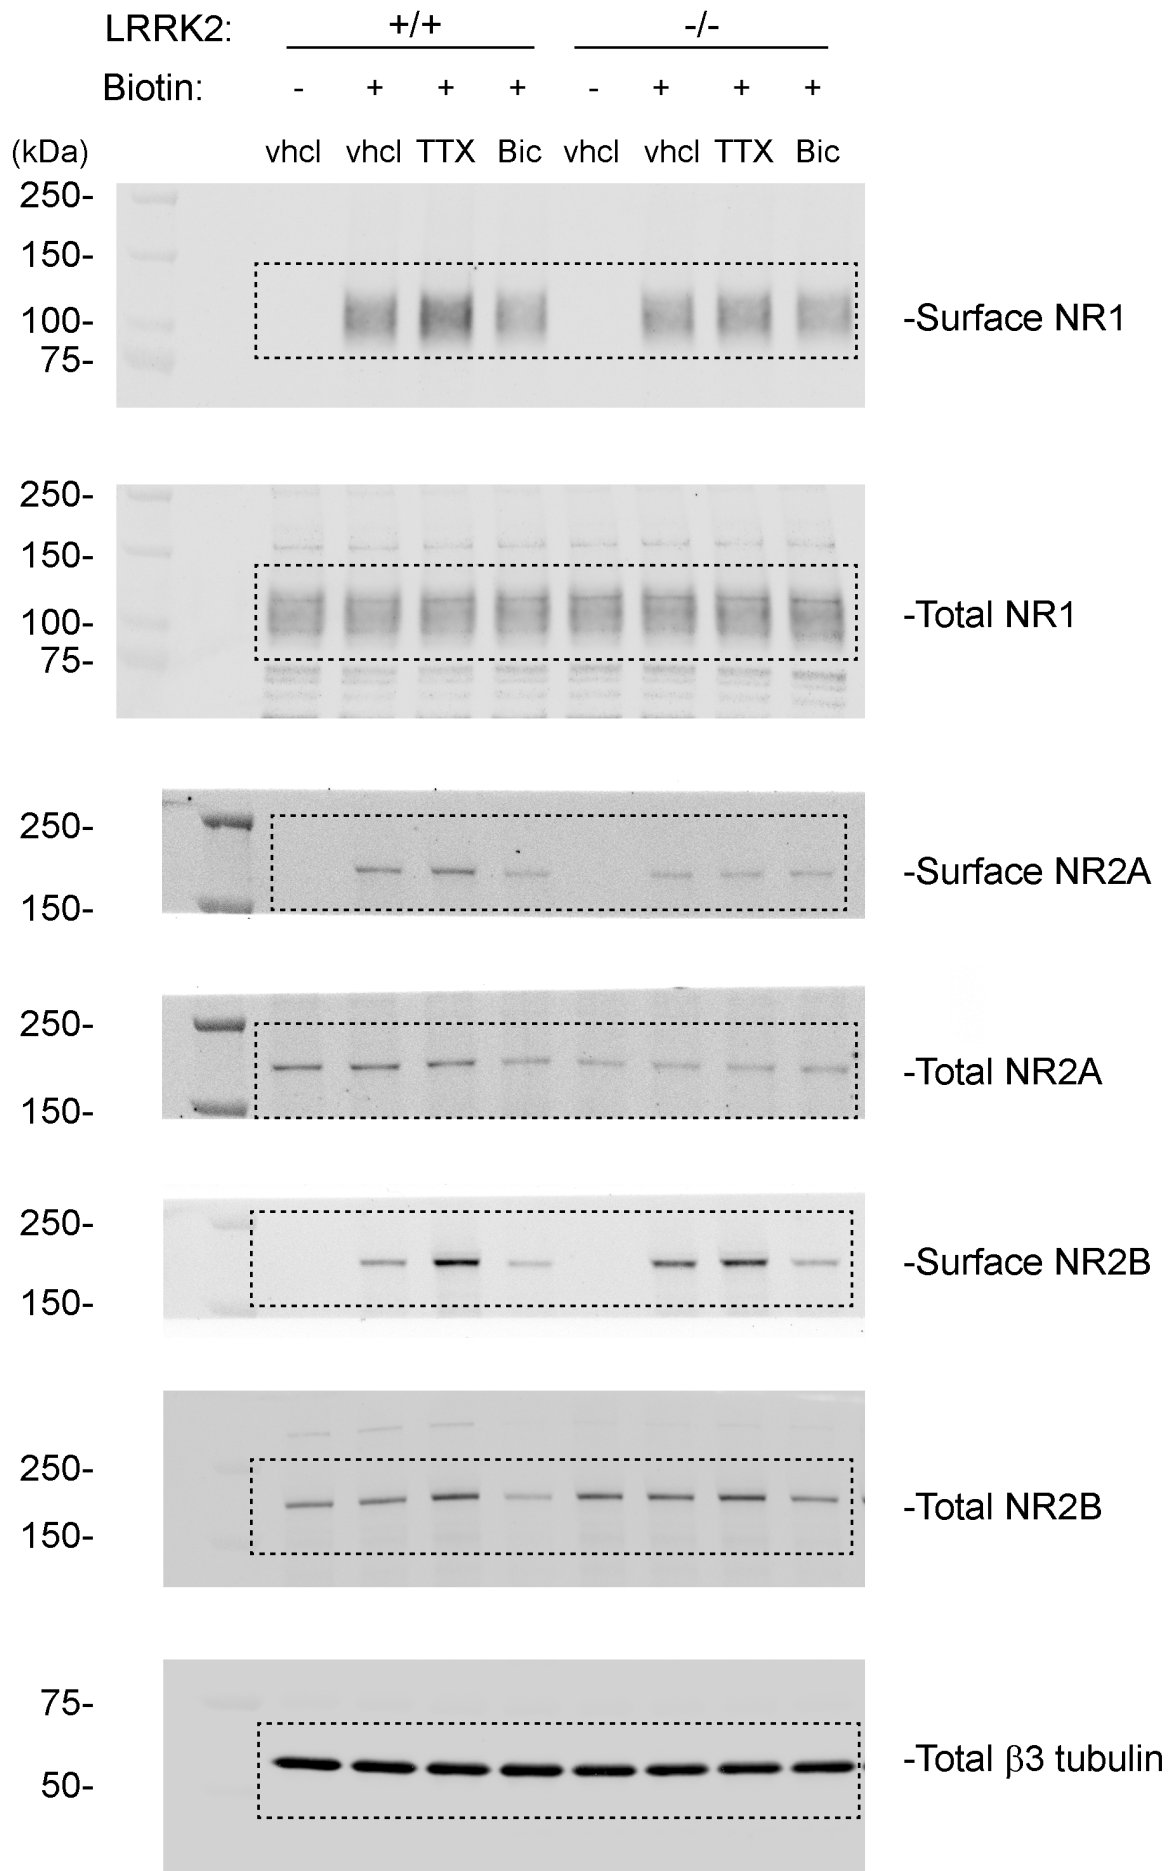

Supplement: embj0033-2314-sd8.pdf [file embj0033-2314-sd8.pdf]
